# Supplementary material
Source: PubMed Central journal article supplement (PMC8097461)
Supplement: AAC.02392-20-s0002.pdf [file AAC.02392-20-s0002.pdf]

## Additional file 2

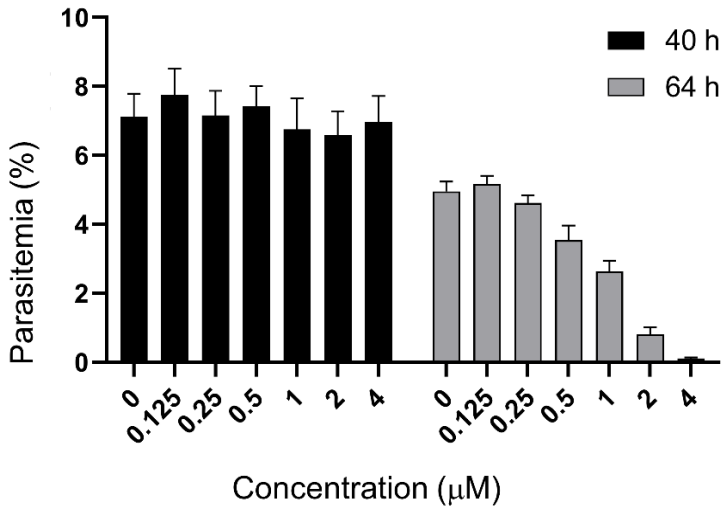

**Figure S1.** Percentage of infected red blood cells exposed to different concentrations of fosmidomycin. At 40 h into the first development cycle, parasitemia was unaffected by fosmidomycin. At this time point, a tenth of each late-stage culture was transferred to fresh culture medium without drug. At 64 h, the parasitemia of the diluted cultures were found to be negatively affected by prior exposure to fosmidomycin concentrations of 1 µM and above. Error bars indicate the standard error of the mean from two independent experiments conducted in quadruplicate.

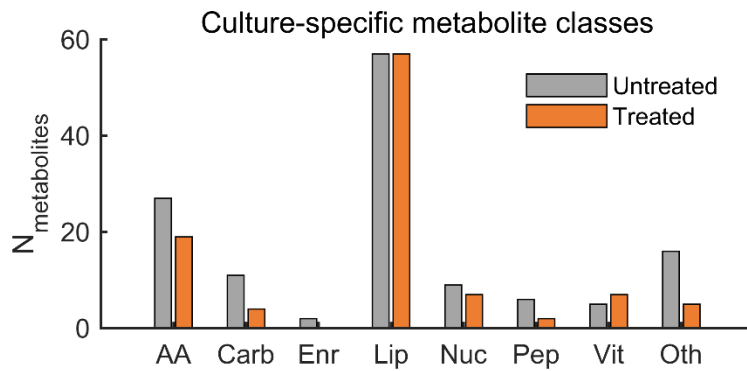

**Figure S2:** Number of metabolites ( $N_{\text{metabolites}}$ ) detected exclusively in untreated and treated cultures under each metabolic class. Metabolites found exclusively in the untreated cultures and treated cultures are grey and orange, respectively. Abbreviations: AA, amino acids; Carb, carbohydrates; Enr, energy; Lip, lipids; Nuc, nucleotides; Pep, peptides; Oth, other.

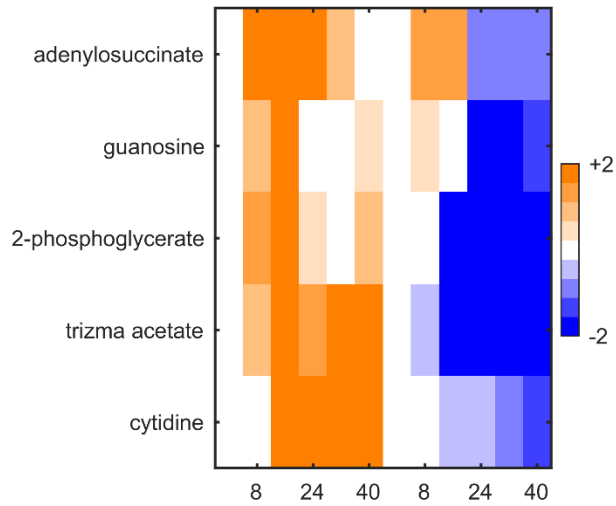

**Figure S3.** Metabolites of Cluster 1 in Fig. 2A of the main text under untreated (CTL) and treated (FOS) cultures of infected erythrocytes

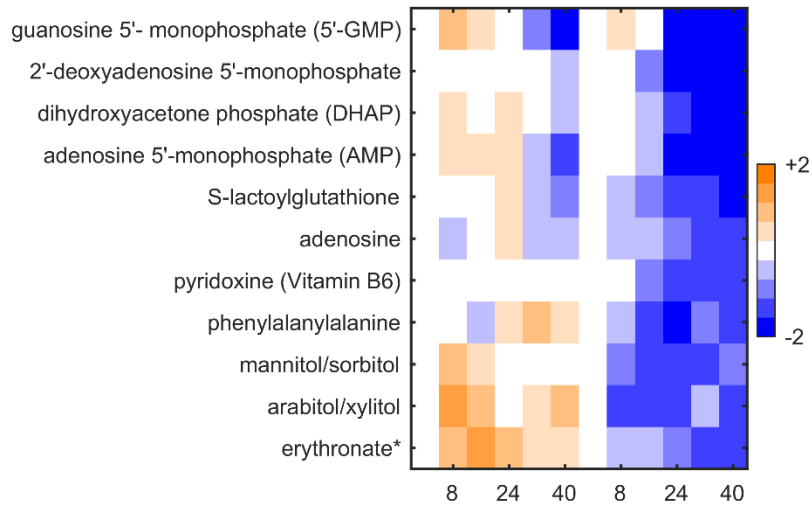

**Figure S4.** Metabolites of Cluster 2 in Fig. 2A of the main text under untreated (CTL) and treated (FOS) cultures of infected erythrocytes

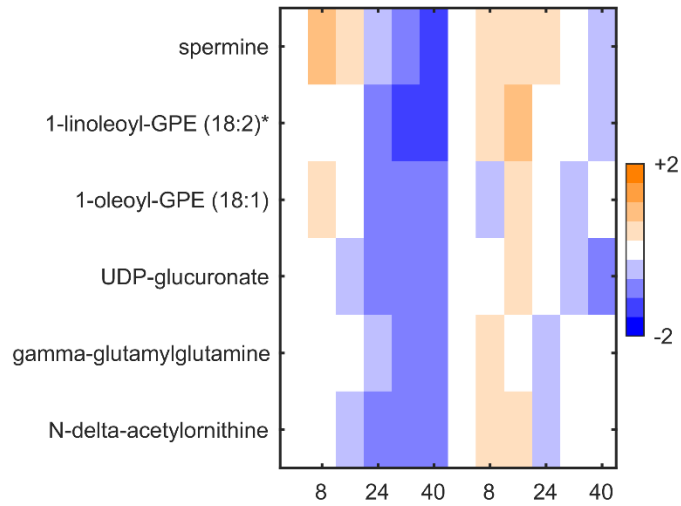

**Figure S5.** Metabolites of Cluster 3 in Fig. 2A of the main text under untreated (CTL) and treated (FOS) cultures of infected erythrocytes

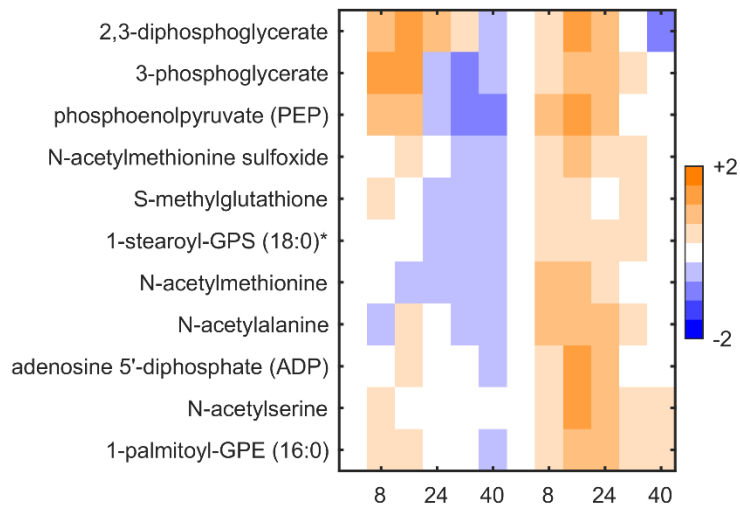

**Figure S6.** Metabolites of Cluster 4 in Fig. 2A of the main text under untreated (CTL) and treated (FOS) cultures of infected erythrocytes

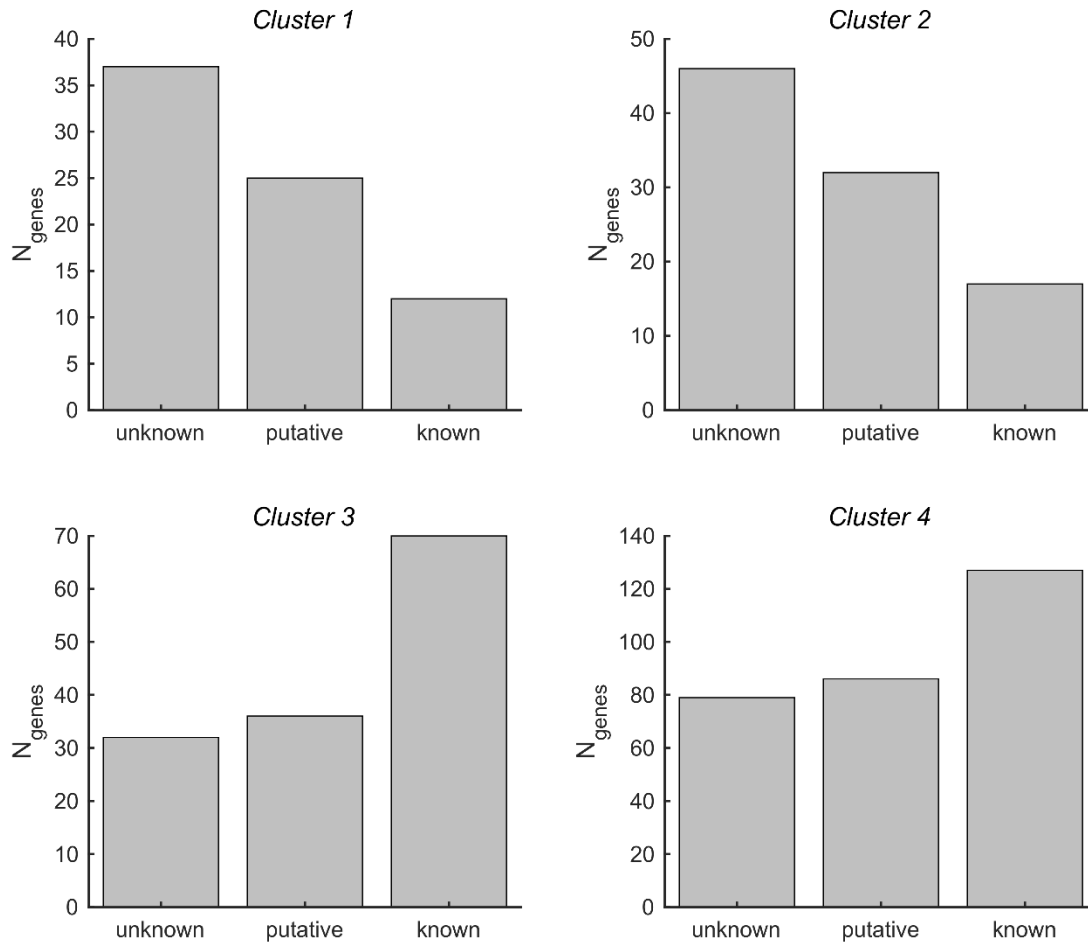

**Figure S7.** *Plasmodium* genes of unknown, putative, and known functions (obtained from [plasmaodb.org](http://plasmaodb.org)) in Clusters 1–4 of Figure 3A in the main text.

### **Ubiquitin-proteasome system in fosmidomycin-treated *P. falciparum***

Our analyses showed that components of the ubiquitin-proteasome system were perturbed by fosmidomycin, including the classic ER-associated degradation (ERAD) pathway (1). Table S1 lists genes that encode proteins of the ubiquitin-proteasome system in *P. falciparum*. The expression levels of both PfpUB and the gene encoding nedd8 (an ubiquitin-like protein) were higher after fosmidomycin treatment. Conjugate addition of nedd8 is a post-translational modification, similar to ubiquitylation, that modifies both proteins and lipids (2). Among the ubiquitin-activating and -conjugating enzymes, ubiquitin-conjugating enzyme (UBC in the Table)—the major component of the ERAD pathway (3)—showed a greater than 10-h delay in  $t_{\text{peak}}$  and an  $\text{FC}_{\text{gene}}$  of 2.5 or greater after fosmidomycin treatment. E3-ubiquitin ligases (Pf3D7\_0312100 and Pf3D7\_0316900), which are involved in the final step of ubiquitylation (4), showed a ~two-fold alteration in expression levels at 0 h after fosmidomycin treatment. The 26S proteasome, which ultimately degrades ubiquitylated proteins (5), showed elevated average expression levels after fosmidomycin treatment (Table S1). The DDI1 gene, which encodes a protein that transports ubiquitylated proteins to the proteasome, showed a similar response ( $\text{FC}_{\text{gene}} = 2$ ), consistent with the view that fosmidomycin-treated parasites deploy compensatory mechanisms to degrade misfolded ER proteins.

**Table S1:** *P. falciparum* genes of the ubiquitin-proteasome system

| Gene ID<br>(PF3D7_)                                   | Name  | Protein description                                    | $t_{\text{peak}}$<br>(h of IDC) <sup>¶</sup> |     | $\text{FC}_{\text{gene}}^{\dagger}$<br>(SD) |
|-------------------------------------------------------|-------|--------------------------------------------------------|----------------------------------------------|-----|---------------------------------------------|
|                                                       |       |                                                        | CTL                                          | FOS |                                             |
| <i>Ubiquitin (Ub) and Ub-like proteins</i>            |       |                                                        |                                              |     |                                             |
| 1211800                                               | PfpUB | Polyubiquitin                                          | 48                                           | 48  | 2.67 (0.66)                                 |
| 1313000                                               | NEDD8 | Ubiquitin-like protein nedd8 homologue, putative       | 0                                            | 33  | 1.39 (0.96)                                 |
| <i>E1 Ub-activating and E2 Ub-conjugating enzymes</i> |       |                                                        |                                              |     |                                             |
| 0817000                                               | UBA3  | NEDD8-activating enzyme E1 catalytic subunit, putative | 26                                           | 30  | 0.89 (0.25)                                 |
| 1144500                                               | AOS1  | SUMO-activating enzyme subunit 1                       | 21                                           | 25  | 0.83 (0.18)                                 |
| 1237000                                               | UBA2  | SUMO-activating enzyme subunit 2                       | 23                                           | 30  | 0.60 (0.18)                                 |
| 1365400                                               | Uba2  | Ubiquitin-activating enzyme                            | 13                                           | 17  | 0.89 (0.20)                                 |
| 1203900                                               | UBC   | Ubiquitin-conjugating enzyme E2                        | 0                                            | 13  | 2.80 (2.25)                                 |
| 0319300                                               | –     | Ubiquitin-conjugating enzyme E2, putative              | 10                                           | 14  | 0.67 (0.18)                                 |
| <i>E3 Ub ligase</i>                                   |       |                                                        |                                              |     |                                             |
| 1232500                                               | –     | CG2-related protein, putative                          | 44                                           | 45  | 1.32 (0.37)                                 |
| 1343400                                               | RAD5  | DNA repair protein RAD5, putative                      | 0                                            | 33  | 0.94 (0.10)                                 |
| 1004300                                               | –     | E3 ubiquitin-protein ligase, putative                  | 0                                            | 0   | 1.28 (0.15)                                 |
| 0316900                                               | –     | E3 ubiquitin-protein ligase, putative                  | 45                                           | 0   | 1.13 (0.35)                                 |
| 0529900                                               | –     | RING zinc finger protein, putative                     | 5                                            | 0   | 1.06 (0.20)                                 |
| 0607200                                               | –     | RING zinc finger protein, putative                     | 27                                           | 32  | 1.11 (0.37)                                 |
| 1405700                                               | –     | RING zinc finger protein, putative                     | 48                                           | 48  | 1.33 (0.14)                                 |
| 0415800                                               | –     | RING zinc finger protein, putative                     | 45                                           | 48  | 1.70 (0.87)                                 |
| 1007300                                               | –     | RING zinc finger protein, putative                     | 46                                           | 43  | 1.40 (0.19)                                 |
| <i>Deubiquitinating enzymes</i>                       |       |                                                        |                                              |     |                                             |
| 1368100                                               | RPN11 | 26S proteasome regulatory subunit RPN11, putative      | 35                                           | 38  | 1.25 (0.16)                                 |
| 1226800                                               | ATX3  | Ataxin-3, putative                                     | 35                                           | 38  | 1.33 (0.20)                                 |
| 1111900                                               | –     | Josephin domain-containing protein, putative           | 27                                           | 30  | 2.18 (1.67)                                 |
| 0923100                                               | –     | OTU domain-containing protein, putative                | 6                                            | 16  | 0.57 (0.34)                                 |
| 1317000                                               | USP39 | U4/U6.U5 tri-snRNP-associated protein 2, putative      | 9                                            | 15  | 0.66 (0.08)                                 |
| 0527200                                               | USP14 | Ubiquitin carboxyl-terminal hydrolase 14               | 33                                           | 25  | 1.34 (0.61)                                 |
| 0516700                                               | –     | Ubiquitin carboxyl-terminal hydrolase 2, putative      | 0                                            | 44  | 1.33 (0.25)                                 |
| 1414700                                               | –     | Ubiquitin carboxyl-terminal hydrolase, putative        | 5                                            | 12  | 1.09 (0.11)                                 |
| 0904600                                               | –     | Ubiquitin specific protease, putative                  | 3                                            | 11  | 1.17 (0.06)                                 |
| <i>Shuttle proteins</i>                               |       |                                                        |                                              |     |                                             |
| 1409300                                               | DDI1  | DNA damage-inducible protein 1, putative               | 39                                           | 41  | 2.03 (0.63)                                 |
| 1011700                                               | RAD23 | DNA repair protein RAD23, putative                     | 21                                           | 17  | 0.86 (0.22)                                 |
| 1113400                                               | DSK2  | Ubiquitin domain-containing protein DSK2, putative     | 48                                           | 0   | 1.00 (0.31)                                 |

<sup>¶</sup>Hour ( $t_{\text{peak}}$ ) of intraerythrocytic developmental cycle (IDC) when the gene was maximally expressed. <sup>†</sup>The fold-change value ( $\text{FC}_{\text{gene}}$ ) of a gene was computed as the ratio of the average gene-expression level under the treated condition to that under the untreated condition. Abbreviations: CTL, untreated; FOS, fosmidomycin-treated; SD, standard deviation.

## References

1. Ponts N, Yang J, Chung DW, Prudhomme J, Girke T, Horrocks P, Le Roch KG. 2008. Deciphering the ubiquitin-mediated pathway in apicomplexan parasites: a potential strategy to interfere with parasite virulence. *PLoS One* 3:e2386.
2. Cappadocia L, Lima CD. 2018. Ubiquitin-like protein conjugation: structures, chemistry, and mechanism. *Chem Rev* 118:889-918.
3. Chung DW, Ponts N, Prudhomme J, Rodrigues EM, Le Roch KG. 2012. Characterization of the ubiquitylating components of the human malaria parasite's protein degradation pathway. *PLoS One* 7:e43477.
4. Hamilton MJ, Lee M, Le Roch KG. 2014. The ubiquitin system: an essential component to unlocking the secrets of malaria parasite biology. *Mol Biosyst* 10:715-723.
5. Ng CL, Fidock DA, Bogyo M. 2017. Protein degradation systems as antimalarial therapeutic targets. *Trends Parasitol* 33:731-743.
